# Supplementary material for: Vapour-Phase-Metalation Nanosurgery by ALD: A Tool for Single Molecular Replacement on Enterobactin for Drug Discovery and Nanomaterial Design
Source: Research Square preprint supplement (doi:10.21203/rs.3.rs-8585986/v1), 2026-01-21
Supplement: Supplementary file 1 [file 3e135a43060d09cba71fac61.docx]

**Vapour-Phase-Metalation Nanosurgery by ALD: A Tool for Single Molecular Replacement on Enterobactin for Drug Discovery and Nanomaterial Design**

Mabel A. Moreno1,2*, Angelica Zacarias3, Andrea Porzel4, Melissa Alegría-Arcos5, Luis Velasquez1, Fernando D. Gonzalez-Nilo6, Anjana Devi7,8, Eberhard K.U. Gross9, Holger B. Deising10**.

1Instituto de Investigación Interdisciplinar en Ciencias Biomédicas SEK (I3CBSEK), Facultad Ciencias de la Salud, Universidad SEK, Chile, Fernando Manterola 0789, Providencia, Santiago.

2Fachbereich Ingenieur- Und Naturwissenschaften, Hochschule Merseburg − University of Applied Sciences, Eberhard-Leibnitz-Str. 2, Merseburg, Germany

*3Max Planck Institute of Microstructure Physics, Weinberg 2, D 06120 Halle, Germany.*

*4Leibniz Institute of Plant Biochemistry, Weinberg 3, D 06120, Halle, Germany*

*5Núcleo de Investigación en Data Science, Facultad de Ingeniería y Negocios, Universidad de las Américas, Santiago 7500000, Chile*

*6Andres Bello University, Facultad de Biologia, Center for Bioinformatics and Integrative Biology. Av Republica 239, Santiago, Chile.*

*7Leibniz Institute for Solid State and Materials Research (IFW), Helmholtzstr. 20, D-01069, Dresden*

*8Faculty of Chemistry and Food Chemistry Dresden University of Technology (TUD)*

*9Fritz Haber Research Center for Molecular Dynamics and Institute of Chemistry, The Hebrew University of Jerusalem, Jerusalem 91904, ISRAEL*

*10Martin-Luther-Universität, Halle-Wittenberg, Naturwissenschaftliche Fakultät III, Betty-Heimann-Str. 3*

Corresponding authors: (*) [mabel.moreno@zonavirtual.uisek.cl](mailto:mabel.moreno@zonavirtual.uisek.cl), (**) [holger.deising@landw.uni-halle.de](mailto:Holger.deising@landw.uni-halle.de)

~~
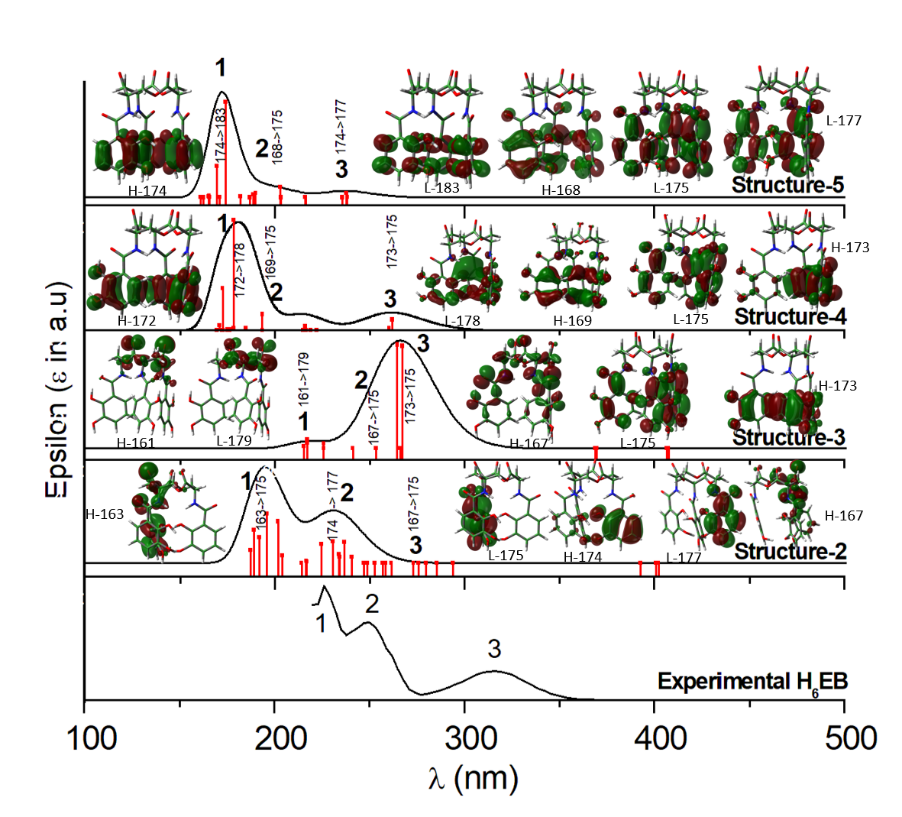
~~

Figure S1. UV-Visible spectra of experimental and calculated H6EB structures 1-5.

Table S1. Excitation energies (nm), molecular orbital contributions and assignments of Enterobactin.

| Structure |  | Enterobactin | | |  | Excitation  Energy (nm) | Contribution | Experimental |
| --- | --- | --- | --- | --- | --- | --- | --- | --- |
| Arm-1 | Arm-2 | Arm-3 |  |  |  |  |
| Structure-2 | H |  |  | ✓ |  | 195.81 | 163→175 | 225.9 |
| L |  |  | ✓ |  |
|  | H | ✓ | ✓ |  |  | 230.62 | 174→177 | 249.2 |
| L |  |  | ✓ |  |
|  | H |  | ✓ | ✓ | ✓ | 273.03 | 167→175 | 315.2 |
| L |  |  | ✓ |  |
| Structure-3 | H |  |  |  | ✓ | 217.07 | 161→179 | 225.9 |
| L |  |  |  | ✓ |
|  | H | ✓ | ✓ |  |  | 253.45 | 167→175 | 249.2 |
| L | ✓ | ✓ | ✓ |  |
|  | H | ✓ | ✓ | ✓ |  | 267.31 | 173→175 | 315.2 |
| L | ✓ | ✓ | ✓ |  |
| Structure-4 | H | ✓ | ✓ | ✓ |  | 184.76 | 172→178 | 225.9 |
| L | ✓ | ✓ | ✓ |  |
|  | H | ✓ | ✓ | ✓ |  | 214.80 | 169→175 | 249.2 |
| L | ✓ | ✓ | ✓ |  |
|  | H |  | ✓ | ✓ |  | 267.31 | 173→ 175 | 315.2 |
| L | ✓ | ✓ | ✓ |  |
| Structure-5 | H | ✓ | ✓ | ✓ |  | 173.99 | 174→183 | 225.9 |
| L | ✓ | ✓ | ✓ |  |
|  | H | ✓ | ✓ | ✓ |  | 202.86 | 168→175 | 249.2 |
| L | ✓ | ✓ | ✓ |  |
|  | H | ✓ | ✓ | ✓ |  | 237.73 | 174→177 | 315.2 |
| L | ✓ |  | ✓ |  |


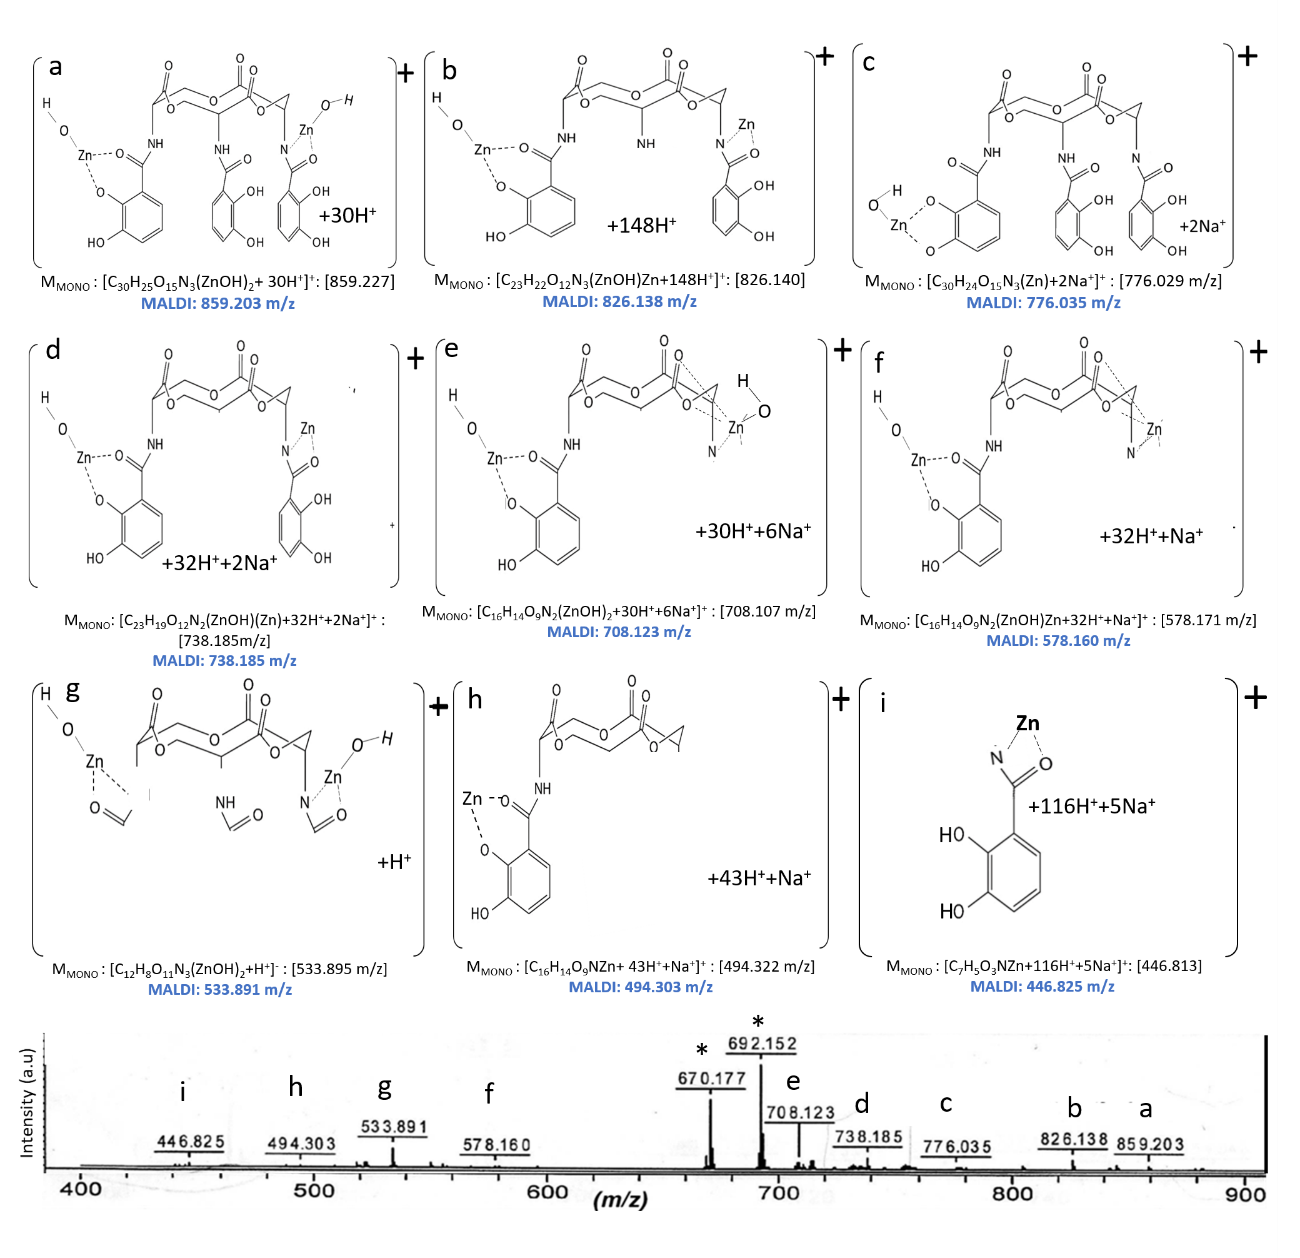


S2. Detailed H6EBZnOH fragments calculated using monoisotopic mass based on MALDI-TOF MS spectra, * reported in [37] and correspond to [H6EB+H+]+ and [H6EB+Na+]+ monoisotopic mass.

.


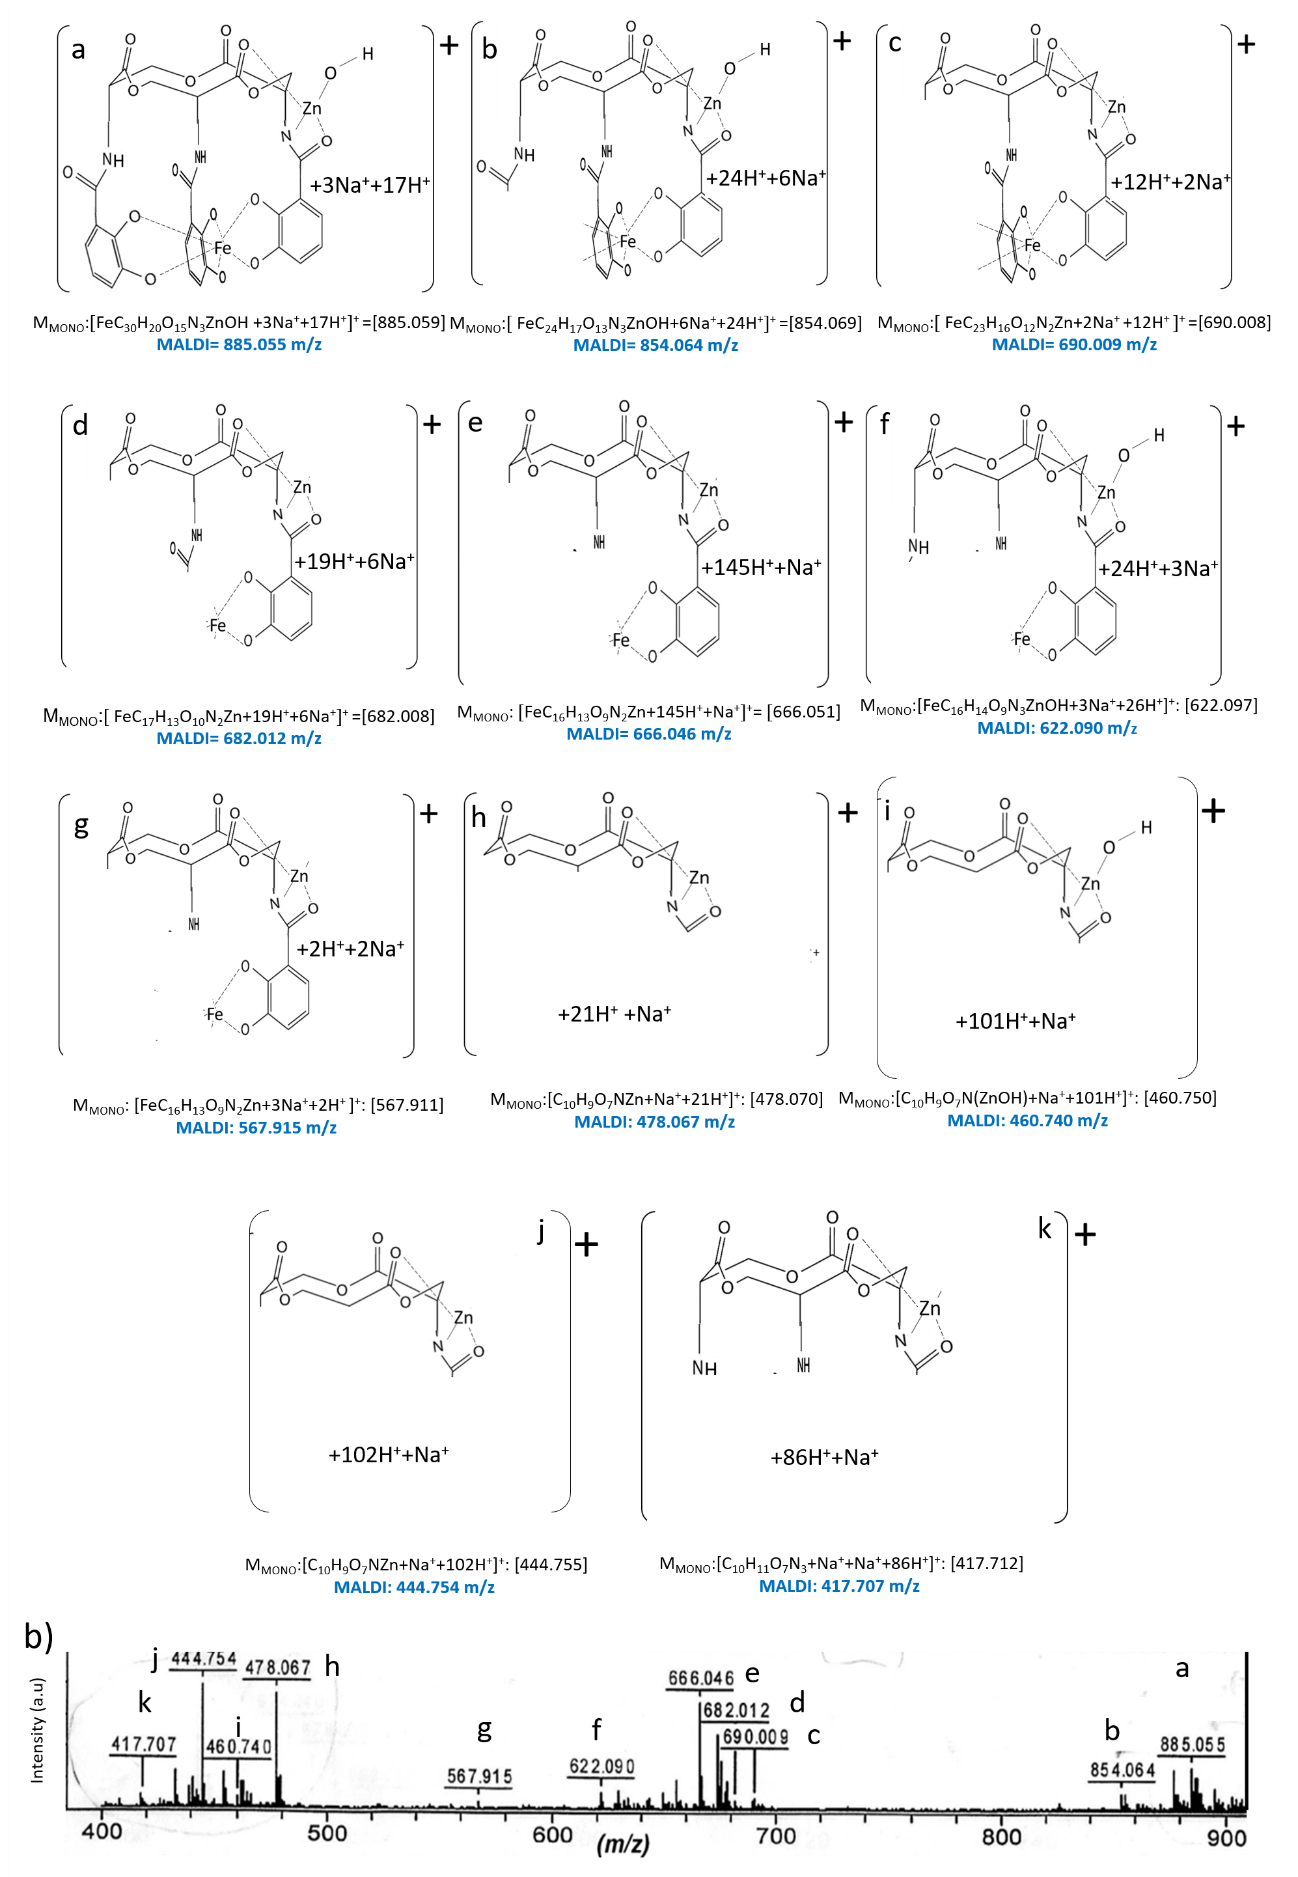


S3. Detailed FeH3EBZnOH fragments calculated using monoisotopic mass based on MALDI-TOF MS spectra.

Table S2. Experimental and Calculated 13C and 1H chemical shifts (ppm) of Model 1, 2 and the average of Model 1+2 of H6EBZnOH.

|  | Calculated  H6EB-ZnOH  (Model 1) | | | | Calculated  H6EB-ZnOH  (Model 2) | | | | Calculated  H6EB-ZnOH  (Model 1+2) | | Exp.  H6EBZnOH  (solvent: CD3OD) | |
| --- | --- | --- | --- | --- | --- | --- | --- | --- | --- | --- | --- | --- |
|  | **1H** | | **13C** | | **1H** | | **13C** | | **1H** | **13C** | **δ1H m (J [Hz])** | **δ 13C** |
| **10”** | 9.29 | 9.02 | 132.52 | 133.19 | 8.05 | 7.69 | 123.7 | 122.75 | 8.35 | 127.97 | 7.34 br d (8.3) | 122.3 |
| **10’** | 9.29 | 136.37 | 8.1 | 128.01 |
| **10** | 8.49 | 130.69 | 6.91 | 116.54 |
| **8”** | 8.21 | 8.36 | 131.72 | 129.82 | 6.55 | 5.95 | 118.8 | 110.37 | 7.16 | 120.10 | 6.87 br d (7.6) | 116.8 |
| **8’** | 8.27 | 131.62 | 6.47 | 121.91 |
| **8** | 8.61 | 126.13 | 4.83 | 90.41 |
| **9”** | 8.07 | 8.02 | 129.36 | 125.55 | 6.87 | 6.50 | 118.48 | 117.98 | 7.26 | 121.77 | 6.35 dd (8.3/7.6) | 113.7 |
|
| **9’** | 8.13 | 129.25 | 6.47 | 116.02 |
| **9** | 7.88 | 118.04 | 6.15 | 119.45 |
| **2** | 5.76 | 5.79 | 45.01 | 44.42 | 3.70 | 4.23 | 38.4 | 36.67 | 5.01 | 40.54 | 5.22 m | 53.9 |
| **2’’** | 6 | 41.42 | 4.80 | 36.4 |
| **2’’** | 5.62 | 46.83 | 4.20 | 35.2 |
| **3A** | 6.94 | 6.19 | 58.27 | 57.66 | 5.23 | 4.69 | 42.29 | 49.18 | 5.44 | 53.42 | 5.38 m | 66.6 |
| **3A** | 6.27 | 56.25 | 4.97 | 52.88 |
| **3A** | 5.35 | 58.45 | 3.87 | 52.36 |
| **3B** | 4.28 | 4.89 | 58.27 | 3.16 | 4.04 | 42.29 | 49.18 | 4.46 | 53.42 | 3.98 br d (11.0) |
| **3B** | 4.11 | 56.25 | 3.65 | 52.88 |
| **3B** | 6.27 | 58.45 | 5.30 | 52.36 |
| **4/4’/4’’** |  | | 187.69/172.59/173.26 | 177.85 |  |  | 166.93/165.62/  135.61 | 156.03 |  | 166.95 |  | 170.9 |
| **5/5’/5’’** |  | | 121.12/129.52/121.30 | 123.98 |  |  | 113.42/112.19/  101.52 | 109.04 |  | 116.51 |  | 117.9 |
| **6/6’/6’’** |  | | 161.60/146.19/145.85 | 151.21 |  |  | 143.06/141.11/  128.62 | 137.60 |  | 144.41 |  | ----- |
| **7/7’/7’’** |  | | 147.21/144.97/150.85 | 149.34 |  |  | 135.96/133.05  /127.16 | 132.06 |  | 140.7 |  | 147.5 |
| **1/1’/1’’** |  | | 177.08/180.15/176.54 | 177.92 |  |  | 189,1/174,92/  178,1 | 180.7 |  | 179.32 |  |  |


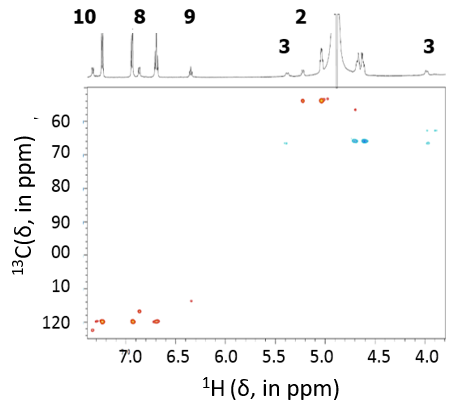


Figure S4. Experimental 2D 13C-1H NMR Spectra of H6EB(ZnOH)2.


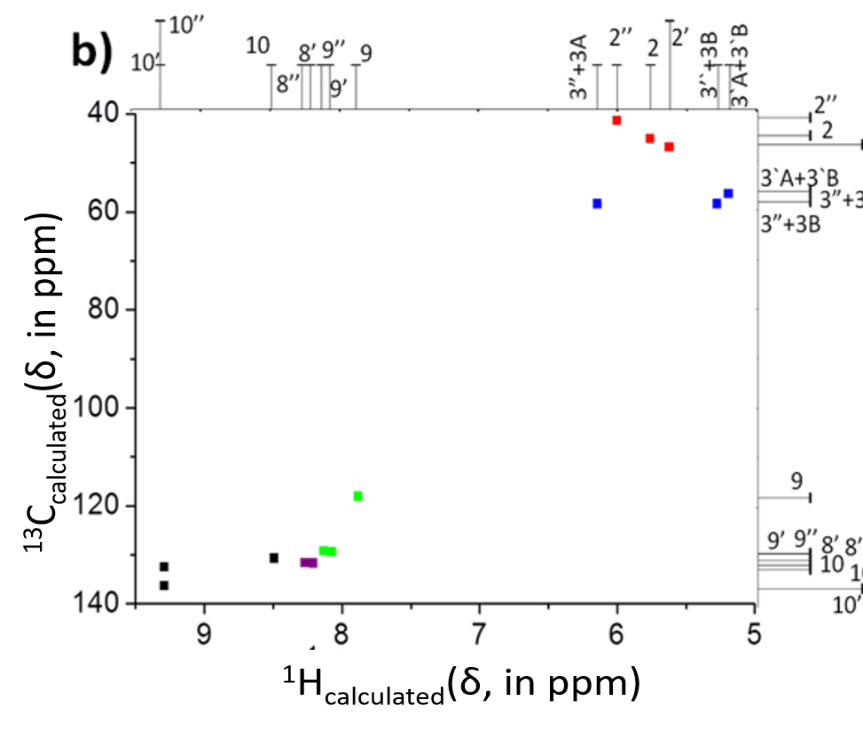


Figure S5. 2D 13C-1H NMR Spectra of simulated H6EB(ZnOH)2 (model 1).


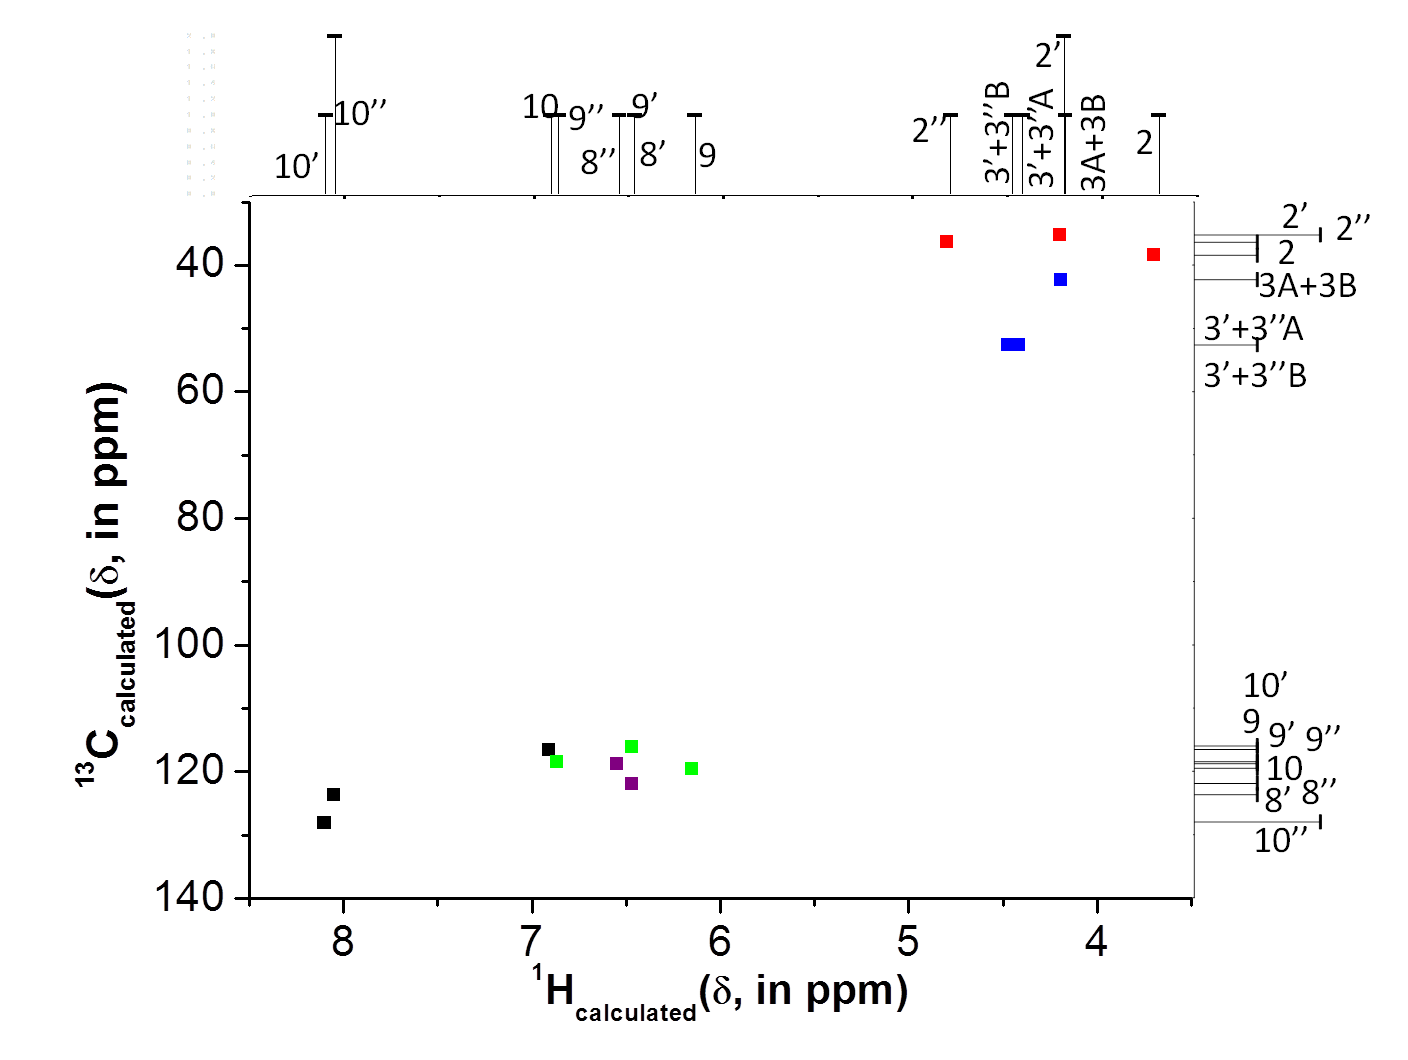


Figure S6. 2D 13C-1H NMR Spectra of simulated H6EB(ZnOH)2 (model 2).


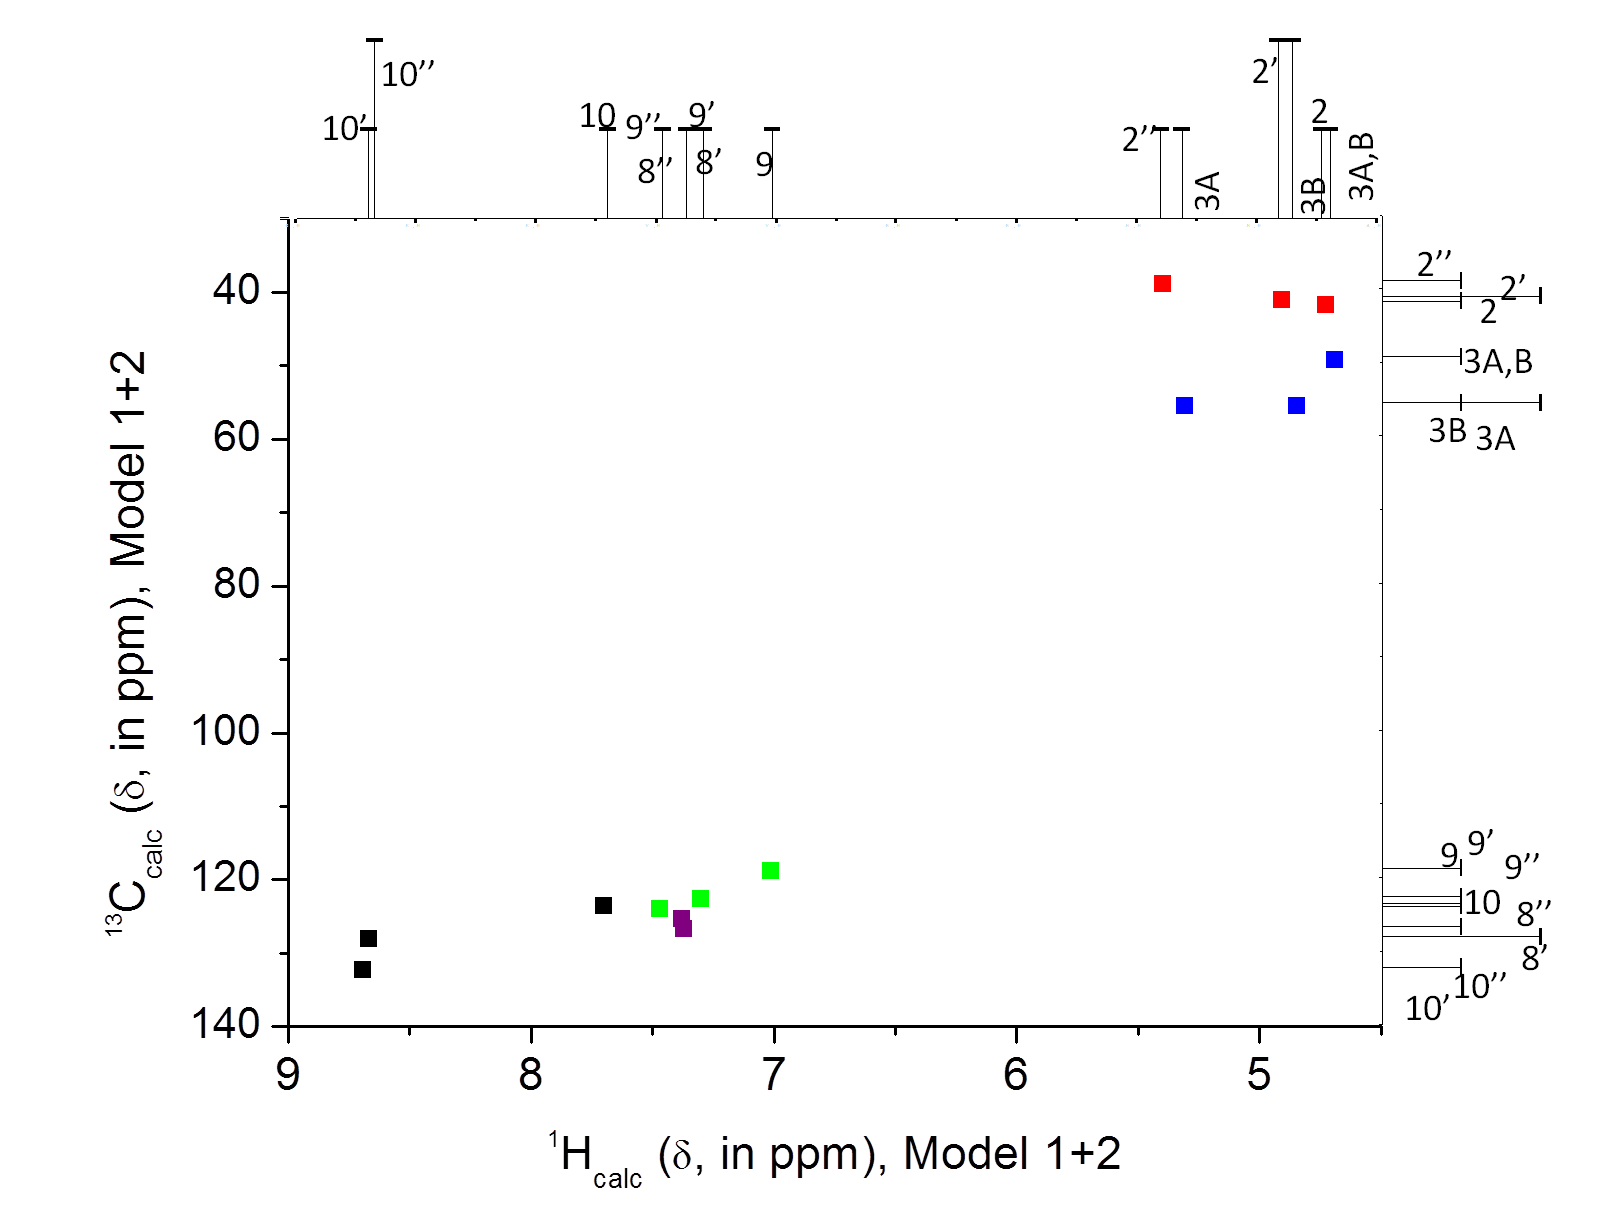


Figure S7. Average 2D 13C-1H NMR Spectra of simulated H6EB(ZnOH)2 for model 1+2.


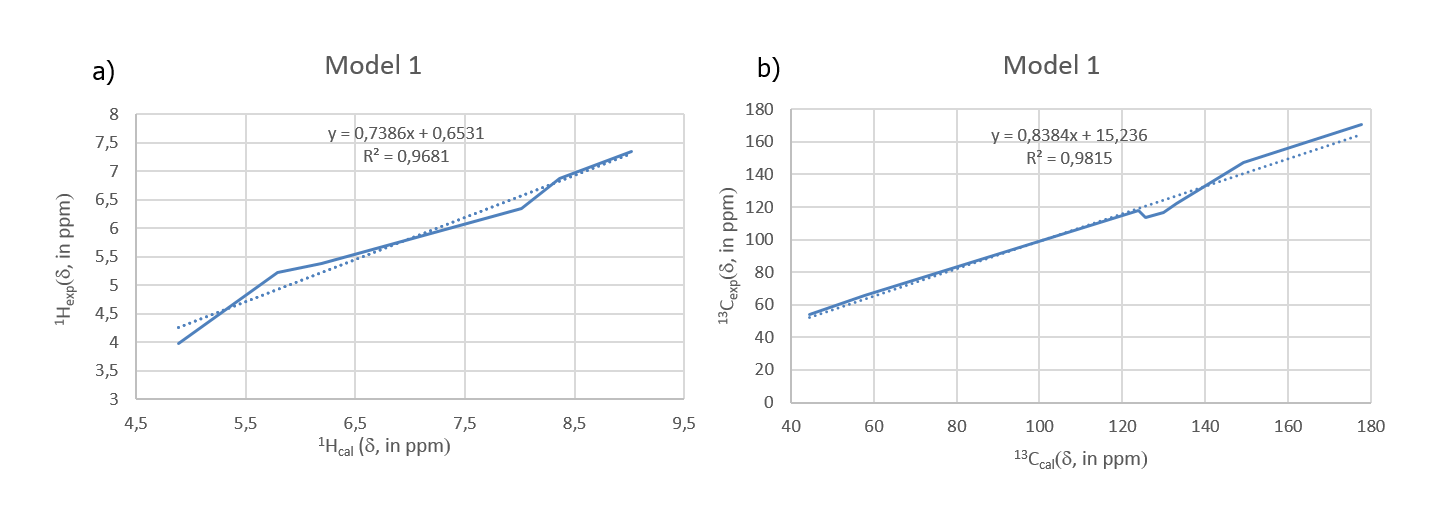


Figure S8. 13C,1H Model 1 linear correlation. a) 1HExperimental and 1Hcalc linear correlation (1HExperimental=0.7386 1Hcalc + 0.6531), and (b) 13Cexperimental and 13Ccalc linear correlation (13CExperimental=0.8384 13Ccalc + 15.236).


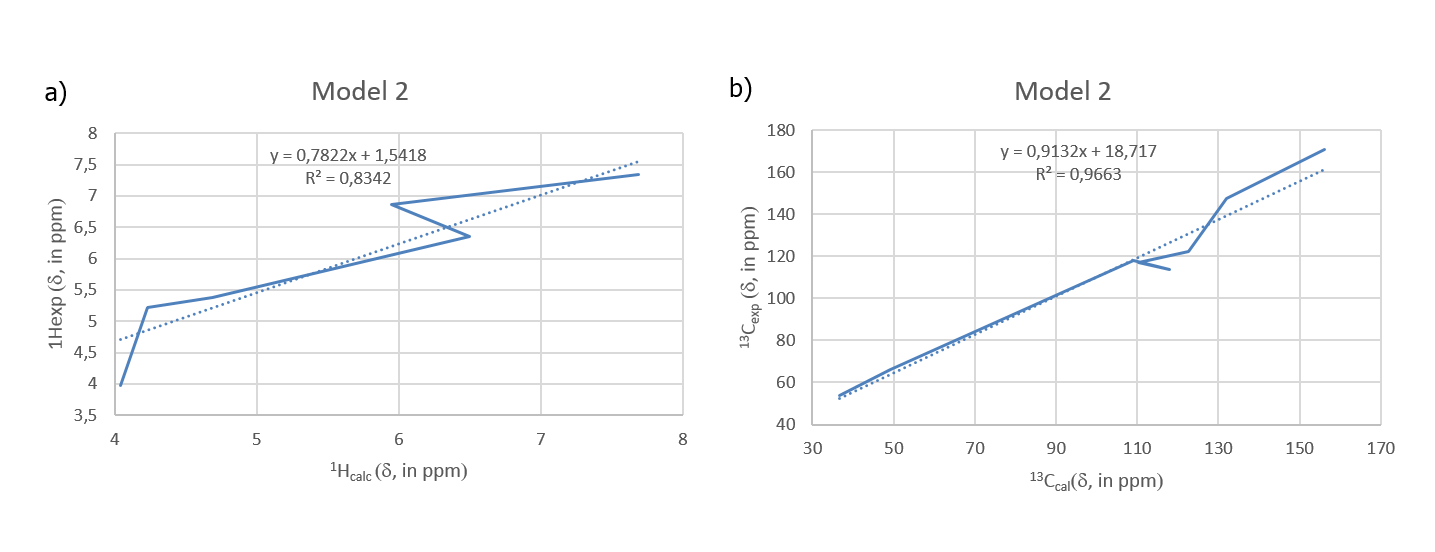


Figure S9. 13C,1H Model 2 linear correlation. a) 1HExperimental and 1Hcalc linear correlation (1HExperimental=0.7822 1Hcalc + 1.5418), and (b) 13Cexperimental and 13Ccalc linear correlation (13CExperimental=0.9132 13Ccalc + 18.717).


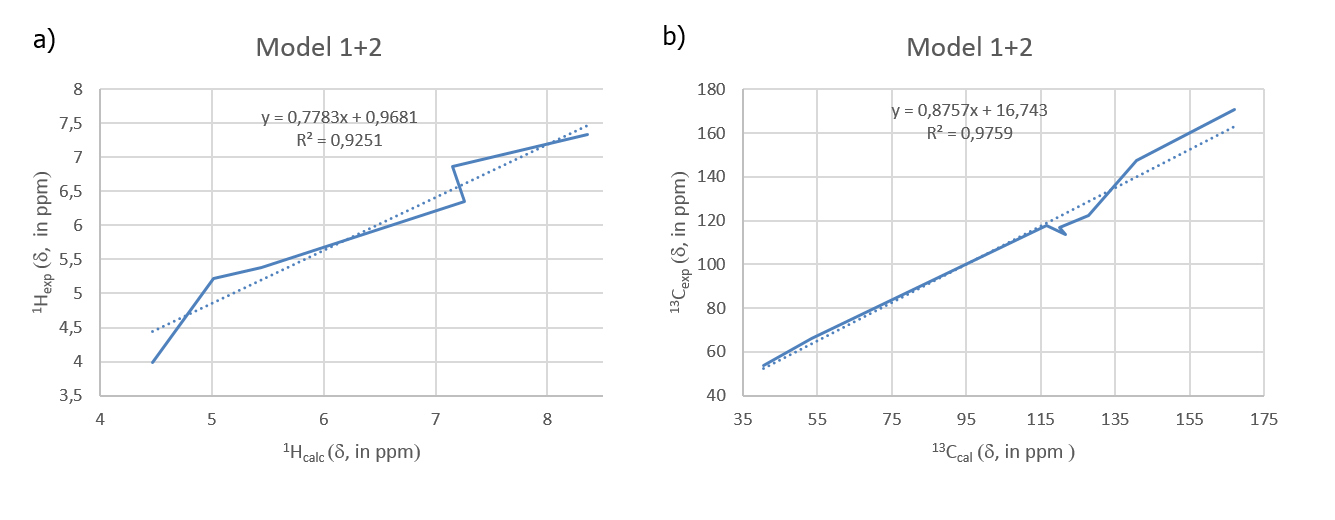


Figure S10. 13C,1H Model 1+2 linear correlation. a) 1HExperimental and 1Hcalc linear correlation (1HExperimental=0.7783 1Hcalc + 0.9681), and (b) 13Cexperimental and 13Ccalc linear correlation (13CExperimental=0.8757 13Ccalc + 16.743).


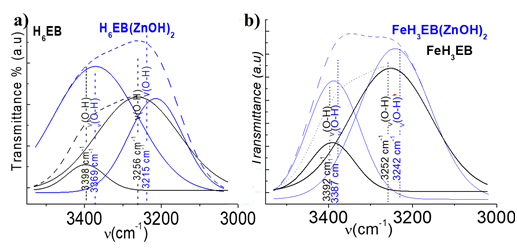


Figure S11. a) H6EB (black) and H6EB-ZnOH (blue) FTIR Spectra on the range 3500-3000 cm-1. Two typical O-H symmetric stretch bands from the catechol, with frequency values of 3256 and 3398 cm-1 for H6EB, and for H6EB(ZnOH)2 3215 and 3369 cm-1. b) Similar effect is found for FeH3EB and FeH3EB(ZnOH), frequency shifts from 3252 and 3392 cm-1 for the bare FeH3EB to 3242 to 3387 cm-1 for FeH3EB(ZnOH). The deconvolution of such bands was realized by means of Gaussian functions using Origin 7.5 program.





Figure S12. FTIR Spectra of H6EB PBE average31 (black), ZnOH linked at CO from amide (blue), and ZnOH linked at CO from catechol (green), in the range of 400-4000 cm-1.

Table S3. Calculated Infrared spectra of FeEnterobactin models compared with experimental result within the range of 1000-2000 cm-1; finger print (*), main peak (**).

| Band Assignment | H6EB  PBE  Average | H6EB  Exp | Band Assignment | Model 3 | Experimental  FeEnterobactin |
| --- | --- | --- | --- | --- | --- |
| C-OH, C-H | 1031.77 | 1072.31 | C3H, C2H | 1003.49  1025.06  C2-H  C3H  C-H |  |
| Car-H, O(C=O), C2H,C3H |
| C-OH, C2-H, C3-H | 1124.99 | 1134.17 | O(C=O), C2H, C3H,  NH | 1065.25  *C3H, C2H, O(C=O), NH | 1060.89** |
| C-OH | 1174.80 | 1176.59 | O(C=O), C2H, C3H,  NH | 1117.88  1120.90  1127.99  C-H, C=C | 1110.99** |
|  |
| C2-H, C3-H, N-H, C-OH |
| C-OH, Car-H |
| Car-H | 1235.19 | 1236.78 | C-H  C=C | 1157.60  1182.97  O-H, C=C, C-H, C3H, C2H. | 1169.00** |
| δar-H, C-OH |
| C2-H in the plane deformation | 1256.43 | 1264.99 | C3H, C2H | 1251.88  C-H,O-H  1262.19  1282.83  1286.12  C-H,O-H  1286.12  1296.49  1317.22  salicyate | 1233.96** |
| C=C |
| N-H, OH, Car-H, | 1336.54 | 1343.36 | C2H+NH+C3H | 1331.48  1351.83  salicyate  1376.09  1388.09  1405.19  1409.28  1417.38  1428.04  C2H+NH+C3H, C(O)-O | 1357.67** |
| C=C, N-H, OH, Car-H, |
| N-H, C2-H, C=C |
| N-H, C2-H, C3-H | 1407.78 | 1390.18 | C2H+NH+C3H | 1433.38  1447.09  1450.27  1469.05  1475.53  Salicylate +OH +C=C |  |
| C2-H |
| C2-H, C=C |
| C=C, C-N N-C2 |

Table S4. Calculated Infrared spectra of FeEnterobactin models compared with experimental result within the range of 1000-2000 cm-1; finger print (*), main peak (**), first part.

| Band Assignment | H6EB-PBE  Average | H6EB  Exp | Band Assignment | Model 3 | Experimental  FeEnterobactin |
| --- | --- | --- | --- | --- | --- |
| C-OH, C-H | 1031.77 | 1072.309 | C3H, C2H | 1003.49  1025.06 |  |
| Car-H, O(C=O), C2H,C3H |
| C-OH, C2-H, C3-H | 1124.99 | 1134.169 | O(C=O), C2H, C3H,  NH | 1065.25  *C3H, C2H, O(C=O), NH | 1060.89** |
| C-OH | 1174.80 | 1176.59 | O(C=O), C2H, C3H,  NH, C=c | 1117.88  1120.90  1127.99 | 1110.99** |
| C2-H, C3-H, N-H, C-OH |
| C-OH, Car-H |
| Car-H | 1235.19 | 1236.78 | O-H, C=C, C-H, C3H, C2H. | 1157.60  1182.97 | 1169.00** |
| δar-H, C-OH |
| C2-H in the plane deformation | 1256.43 | 1264.99 | C3H, C2H | 1251.88/C-H,O-H  1262.19  1282.83  1286.12/C-H,O-H  1286.12  1296.49  1317.22/salicyate | 1233.96** |
| C=C |
| N-H, OH, Car-H, | 1336.54 | 1343.36 | C2H+NH+C3H | 1331.48  1351.83/salicyate  1376.09  1388.09  1405.19  1409.28  1417.38  1428.04 | 1357.67** |
| C=C, N-H, OH, Car-H, |
| N-H, C2-H, C=C |
| N-H, C2-H, C3-H | 1407.78 | 1390.18 | C2H+NH+C3H | 1433.38  1447.09  1450.27  1469.05  1475.53/Salicylate +OH +C=C |  |
| C2-H |
| C2-H, C=C |
| C=C, C-N N-C2 |

Table S5. Calculated Infrared spectra of FeEnterobactin models compared with experimental result within the range of 1000-2000 cm-1; *Average, second part.

| Band Assignment | H6EB-PBE | Band Assignment | | Model 3 | | H6EB-PBE | Experimental  FeEnterobactin |
| --- | --- | --- | --- | --- | --- | --- | --- |
| C=C, N-C2 | 1461.42 | C2H+ C3H+NH | | 1450.4  1453.1  1466.6  Catecholate-like | 1516.5  C22H  1524.24  salicylate | 1499.07  1502.59  1511.70  1516.47  1520.25  1524.12  1531.99  1539.70  1564.56  1566.88 | 1455.22 |
| C=C |
|  |  |  | |  | 1551.67  1569.20  salicylate |  |  |
| C3-H | 1538.35 | C3H | | 1514.02  1532.64  1534.30  C3H |  |  |  |
| C3-H |
| C3-H |
| C=C |
| C=C |
| C=C |
| C=C | 1588.92 | O(C=O), C=C | | 1555.31  1574.53  1604.32  Catecholate-like | 1619.25  1632.13  1645.33  Salicylate  C=C | 1603.80  1609.52  1627.30  1711.01 | 1544.41  1640.41 |
| C=C |
| C=C |
| N-(C=O)- (amide) | 1644.31 | C=C, N-(C=O) | | 1607.3  1620.7  1622.7  Catecholate-like | 1672.30  1677.07  1683.9  Salicylate  C=C |  |  |
| N-(C=O)- (amide) |
| N-(C=O)-,C=C | | 1631.9  1670.5  1675.8  1681.2  1685.5  Catecholate-like |  |  |  |
| N-(C=O)- (amide) | 1750.26 |  | | 1736.4  1740.4  1733.7  1740.4  amide | 1710.31  1730.35  1754.88  1765.18  1777.77  1789.40 | 1714.79  1721.58 | 1700.03  1746.33  1832.48 |
| N-(C=O)- (amide) |
| N-(C=O)- (amide) |
| C-(C=O)- (ester) | 1817.34 | 1836.71* | C-(C=O)- (ester), C2H, N-H | 1800.4  1815.9  1825.2  Ester | 1818.73 | 1736.40  1744.64  1748.49  1780.50 | 1859.80  1874.23  1915.22 |
| C-(C=O)- (ester) | 1835.11 |
| C-(C=O)- (ester) | 1857.68 |


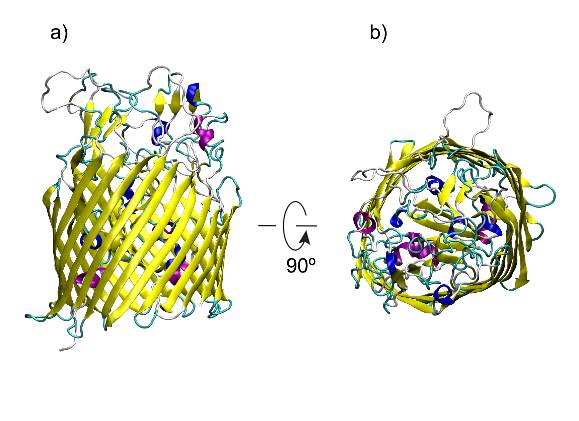


Figure S13. Ribbon diagram of the complete FepA modeled with MODELLER software. A) Side view of FepA. The extracellular space is located at the top of Figure, and the periplasmic space is at the bottom. b) FepA as viewed from the periplasm; α-helices are shown in purple, the β-strands are shown in yellow and the loops are shown in cyan and white.


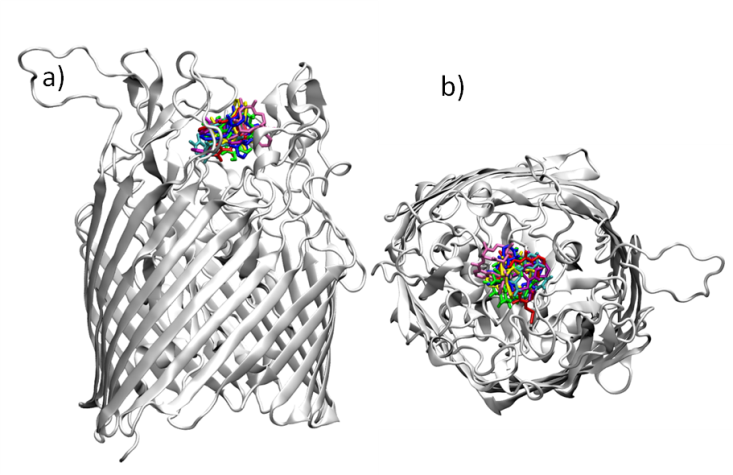


Figure S14. Ligand-protein Molecular docking showing the best conformation reported for each ligand obtained with the Glide software; a) Side view of FepA with the ligands in the central position, and b) Preferential ligand distribution in FepA as viewed from the periplasm. Ligands are shown together, but the docking calculation was donefor an individual ligand.

Table S6. Amino acid residues localised in the first ligand coordination sphere (at 3Ǻ). (L: loop, I: Inner structure, yellow region in the concentrical part of FepA, see Figure S14).

| System | L7 | L11 | L10 | L4 | L3 | L2 | I |
| --- | --- | --- | --- | --- | --- | --- | --- |
| [FeEB]3- | K483  S490 | N688  T692  I701 |  |  | N266  T264 | Y217  T220 | Q65 |
| H6EB | K483  Y481  A491  S482 | N688  T692 | Y638 | E319 | D263  T264 | Y217 | Q65  R66 |
| [Fe(EB)ZnOH]3- | K483  S490  A491 | T692 | Y638 | E319 | T264 |  | R102  W101  Q65 |
| Model 1 | K483  Y481  S482  A491  L470 |  | Y638 | G320  E319  L321 | T264 |  | Q65  R66  R92  W101  E104 |
| Model 2 | K483  Y481  S482  A491  L480 |  | Y638 | G320  E319  L321 | T264 |  | Q65  R102  W101  G100  E104 |
| Model 3 | K483  Y481  S482  A491 |  | Y638 | G320  E319 | T264 |  | Q65  R102  W101  G100 |
